# Supplementary material
Source: Springer Nature journal article supplement (https://www.springermedizin.de/resource/supplementary/12889_2012_5032_MOESM1_ESM.pdf/9494536)
Supplement: MOESM1 [file 9494536]

7 208 (who did not already have CD diagnosed) had blood analyzed

63 excluded  
(61 already diagnosed  
+ 2 misclassified)

207 with CD  
90 (43%) boys  
117 (57%) girls

828 referents  
360 (43%) boys  
468 (57%) girls

144 screening-  
detected cases  
70 (49%) boys  
74 (51%) girls

**103 (72%) cases responded**  
at baseline and follow-up  
47 (46%) boys  
56 (54%) girls

**483 (58%) referents responded**  
at baseline and follow-up  
208 (43%) boys  
275 (57%) girls
